# Supplementary material for: Photochromic performance of a dithienylethene-indolinooxazolidine hybrid
Source: Royal Society of Chemistry journal article supplement (doi:10.1039/b9pp00127a), 2010-01-06

## SUPPLEMENTARY INFORMATION

### Photochromism of a dithienylethene and indolino-oxazolidine hybrid one-molecule

Guillaume Sevez,<sup>a</sup> Jiaan Gan,<sup>a</sup> Stéphanie Delbaere,<sup>b</sup> Gaston Vermeersch,<sup>b</sup> Lionel Sanguinet,<sup>c</sup> Eric Levillain,<sup>c</sup> and Jean-Luc Pozzo<sup>\*a</sup>

<sup>a</sup> Université de Bordeaux, Institut des Sciences Moléculaires, UMR CNRS 5255, France. Fax: +33 54000 6158; Tel: +33 54000 272.

Jean-Luc Pozzo; E-mail: [jl.pozzo@ism.u-bordeaux1.fr](mailto:jl.pozzo@ism.u-bordeaux1.fr)

<sup>b</sup> Université Lille Nord de France, UDSL, UMR CNRS 8009, Lille, France.

<sup>c</sup> Université Angers, CIMA, UMR CNRS 6501, Angers, France.

Figure S1. <sup>1</sup>H NMR spectrum of the colourless form **1a** in deuterated chlorobenzene ( $C=6.58 \times 10^{-3}$  mol.L<sup>-1</sup>)

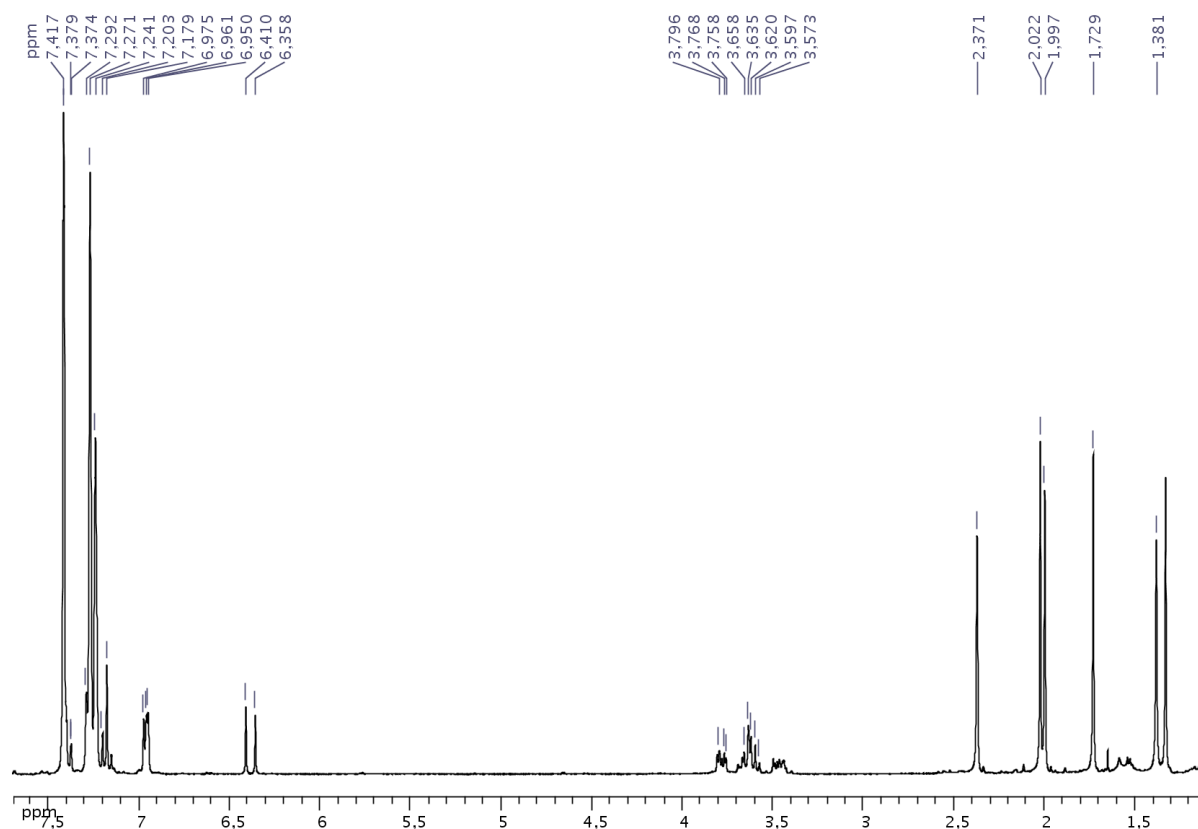

Figure S2.  $^1\text{H}$  NMR spectrum of the mixture of **1a** (30%) and **1b** (70%) in deuterated chlorobenzene after an irradiation at 313 nm

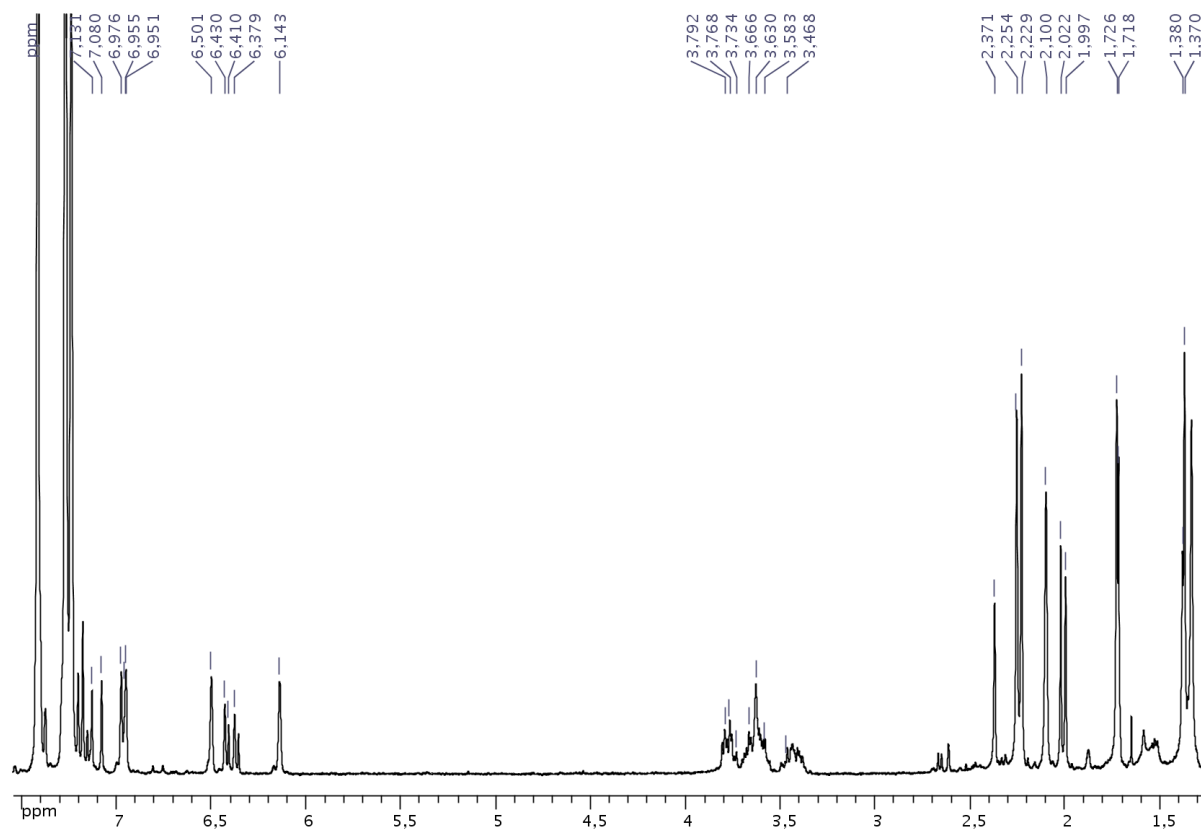

Figure S3. Evolution of the proportion of **1a** and **1b** in acetonitrile among irradiation at 254 nm, pink : **1a** and blue : **1b**.

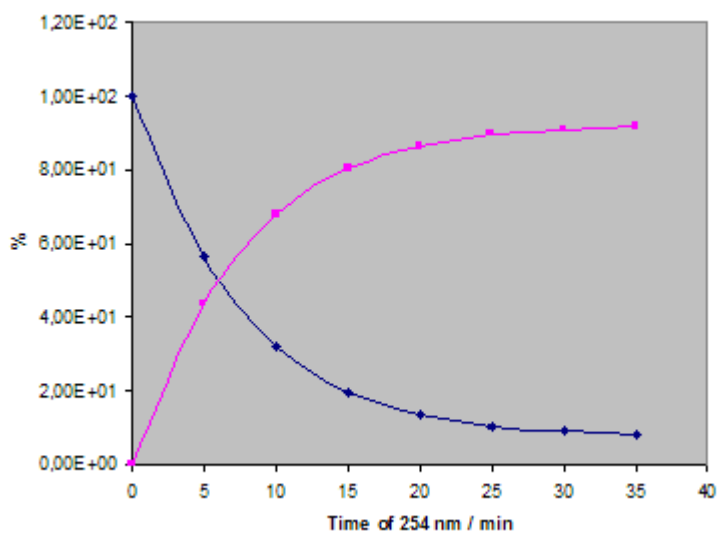

Supplement: b9pp00127a.pdf [file b9pp00127a.pdf]
